# Supplementary material for: Humidity-induced CO2 capture enhancement in Mg-CUK-1
Source: Royal Society of Chemistry journal article supplement (doi:10.1039/c8dt03365j), 2018-01-01
Supplement: c8dt03365j1.pdf [file c8dt03365j1.pdf]

# Electronic Supporting Information for

## Humidity-induced CO<sub>2</sub> capture enhancement in

### Mg-CUK-1

*Mónica Sagastuy-Breña,<sup>a†</sup> Paulo G. M. Mileo,<sup>b†</sup> Elí Sánchez-González,<sup>a</sup> Joseph E. Reynolds III,<sup>c</sup> Tamara Jurado-Vázquez,<sup>a</sup> Jorge Balmaseda,<sup>a</sup> Eduardo González-Zamora,<sup>d</sup> Sabine Devautour-Vinot,<sup>b</sup> Simon M. Humphrey,<sup>c,\*</sup> Guillaume Maurin<sup>b,\*</sup> and Ilich A. Ibarra<sup>a,\*</sup>*

<sup>a</sup>Laboratorio de Fisicoquímica y Reactividad de Superficies (LaFReS), Instituto de Investigaciones en Materiales, Universidad Nacional Autónoma de México, Circuito Exterior s/n, CU, Del. Coyoacán, 04510, Ciudad de México, Mexico.

<sup>b</sup>Institut Charles Gerhardt Montpellier, UMR-5253, Université de Montpellier, CNRS, ENSCM, Place E. Bataillon, 34095 Montpellier cedex 05, France.

<sup>c</sup>Department of Chemistry, The University of Texas at Austin, Welch Hall 2.204, 105 East 24<sup>th</sup> St., Stop A5300, Austin, Texas 78712-1224, United States.

<sup>d</sup>Departamento de Química, Universidad Autónoma Metropolitana-Iztapalapa, San Rafael Atlixco 186, Col. Vicentina, Iztapalapa, C. P. 09340, Ciudad de México, Mexico.

<sup>†</sup>These authors contributed equally to this work.

## 1. Characterisation of Mg-CUK-1

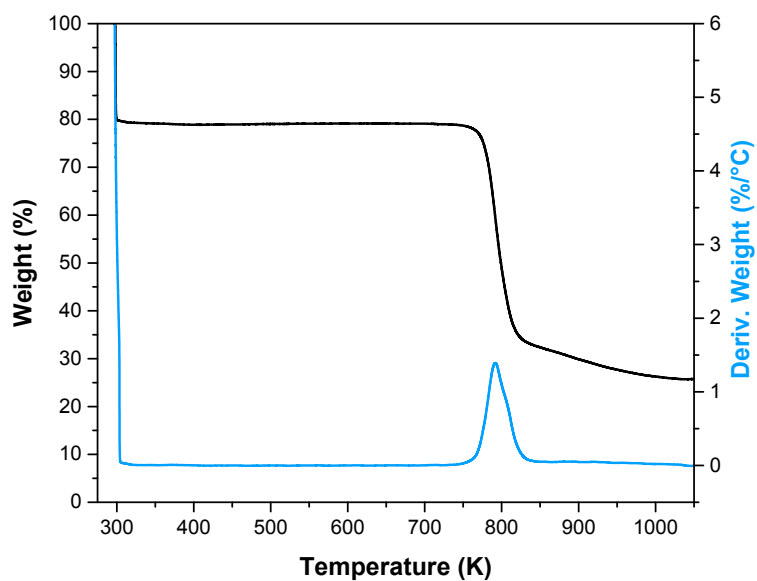

**Fig. S1.** Thermogravimetric analysis profile of Mg-CUK-1 as synthesised, under N<sub>2</sub> atmosphere.

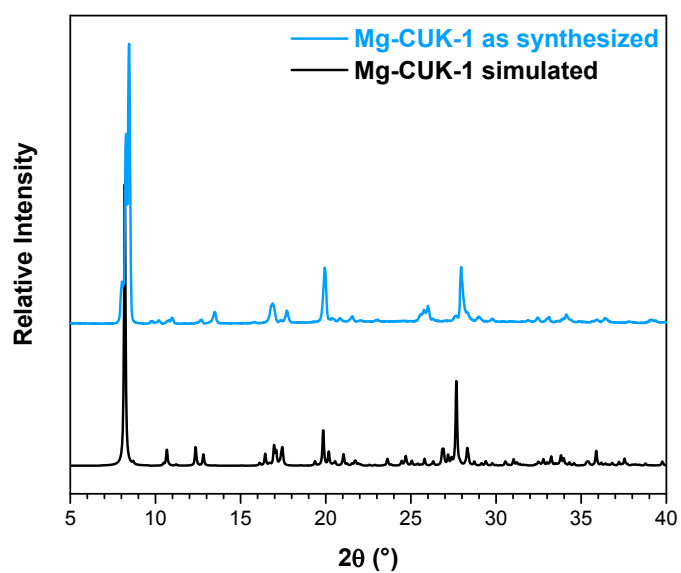

**Fig. S2.** PXRD pattern of Mg-CUK-1 as synthesised.

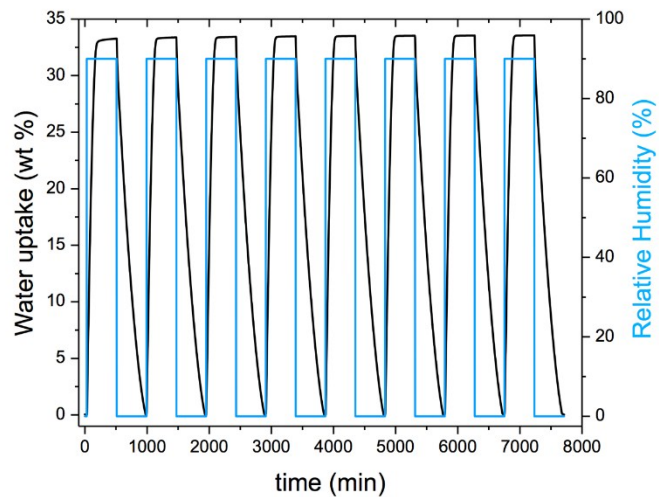

**Fig. S3.** Water adsorption-desorption stability of Mg-CUK-1 after 8 cycles performed from %  $P/P_0$  0 to 90 at 303K.

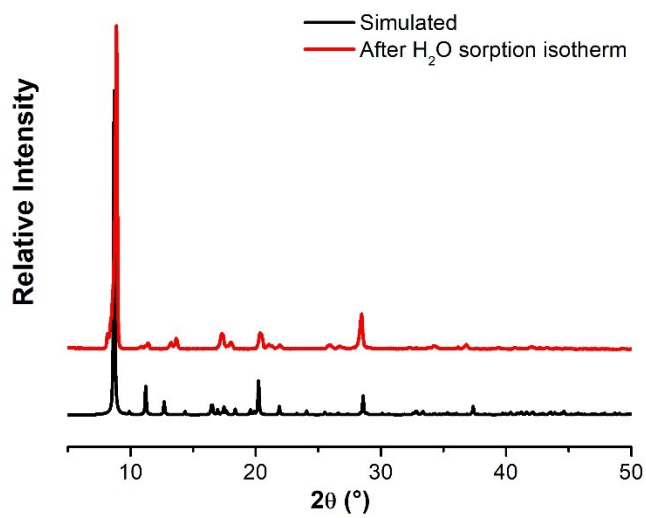

**Fig. S4.** PXRD pattern of Mg-CUK-1 after H<sub>2</sub>O sorption isotherm.

## 2. Kinetic CO<sub>2</sub> uptake experiments of Mg-CUK-1 at different relative humidities

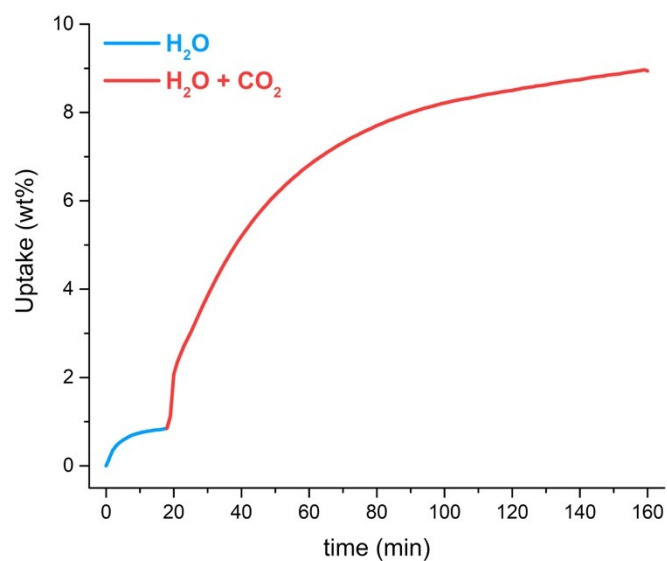

**Fig. S5.** Kinetic CO<sub>2</sub> uptake experiments carried out at 18 %RH at 303 K; H<sub>2</sub>O (blue line) and H<sub>2</sub>O+CO<sub>2</sub> (red line).

**Table S1.** H<sub>2</sub>O+CO<sub>2</sub> capture cycling experiments on Mg-CUK-1. Activation (373 K for 1h and under a N<sub>2</sub> gas flow) of the same sample was performed before starting each cycle.

| Cycle | H <sub>2</sub> O+CO <sub>2</sub> Uptake (wt%, kinetic experiments) |
|-------|--------------------------------------------------------------------|
| 1     | 8.5                                                                |
| 2     | 8.4                                                                |
| 3     | 8.6                                                                |
| 4     | 8.5                                                                |
| 5     | 8.4                                                                |
